# Supplementary material for: A Type II-B Cas9 nuclease with minimized off-targets and reduced chromosomal translocations in vivo
Source: PubMed Central journal article supplement (PMC10482872; doi:10.1038/s41467-023-41240-7), 2023-09-06
Supplement: 41467_2023_41240_MOESM2_ESM.pdf [file 41467_2023_41240_MOESM2_ESM.pdf]

**Title:** Supplementary Data 1.

**Description:** Output of the PILER-CR analysis of CRISPR repeats.

**Title:** Supplementary Data 2.

**Description:** RNA Sequences and DNA oligos used in the study.

**Title:** Supplementary Data 3.

**Description:** Protein sequences and DNA constructs used in the study.

**Title:** Supplementary Data 4.

**Description:** CRISPResso 2 parameters.

**Title:** Supplementary Data 5.

**Description:** Detailed description of Duplex-Seq.

**Title:** Supplementary Data 6.

**Description:** Enrichment probes and VariantCalling analysis regions.

**Title:** Supplementary Data 7.

**Description:** CHANGE-seq data.
